# Supplementary material for: Super-resolution imaging of cancer-associated carbohydrates using aptamer probes
Source: Royal Society of Chemistry journal article supplement (doi:10.1039/c9nr03948a), 2019-01-01
Supplement: c9nr03948a1.pdf [file c9nr03948a1.pdf]

## Supporting Information For

### Super-resolution imaging of cancer-associated carbohydrates using aptamer probes

Yingying Jing,<sup>a,b</sup> Junling Chen,<sup>c</sup> Lulu Zhou,<sup>a</sup> Jiayin Sun,<sup>a</sup> Mingjun Cai,<sup>a</sup> Yan Shi,<sup>a</sup> Yongmei Tian,<sup>d</sup>  
Jing Gao,<sup>\*a</sup> and Hongda Wang<sup>\*a,e</sup>

<sup>a</sup> State Key Laboratory of Electroanalytical Chemistry, Changchun Institute of Applied Chemistry, Chinese Academy of Sciences, Changchun, Jilin 130022, P. R. China.

<sup>b</sup> University of Science and Technology of China, Hefei, Anhui, 230027, P. R. China.

<sup>c</sup> Wuhan University of Science and Technology, Wuhan, Hubei, 430081, P. R. China.

<sup>d</sup> College of Public Health, Zhengzhou University, Zhengzhou, Henan, 450001, P. R. China.

<sup>e</sup> Laboratory for Marine Biology and biotechnology, Qing dao National Laboratory for Marine Science and Technology, Wenhai Road, Aoshanwei, Jimo, Qingdao, Shandong 266237, P. R. China.

E-mail: gaojing@ciac.ac.cn;

hdwang@ciac.ac.cn;

Fax: +86 431 85262453;

Tel: +86 431 85262453

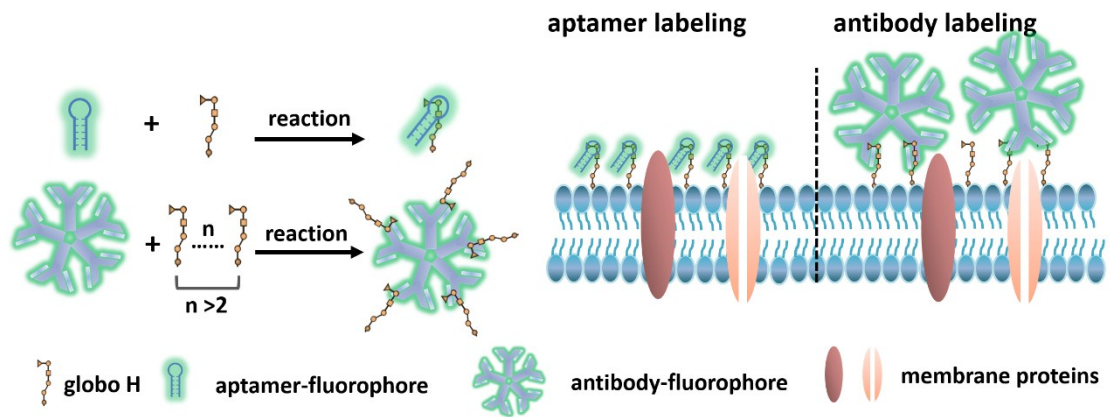

**Fig.S1** Schematic of the recognition principle of aptamer and antibody in solution or on cell membrane. The aptamer is a monovalent DNA chain which has only one binding site to link globo H either in solution or on the cell membrane. However, the antibody (Mbr1, a kind of IgM) has multiple recognition sites that may cause globo H to cross-link, and steric hindrance caused by the large size of the antibody can lead to incomplete labeling on cell membrane.

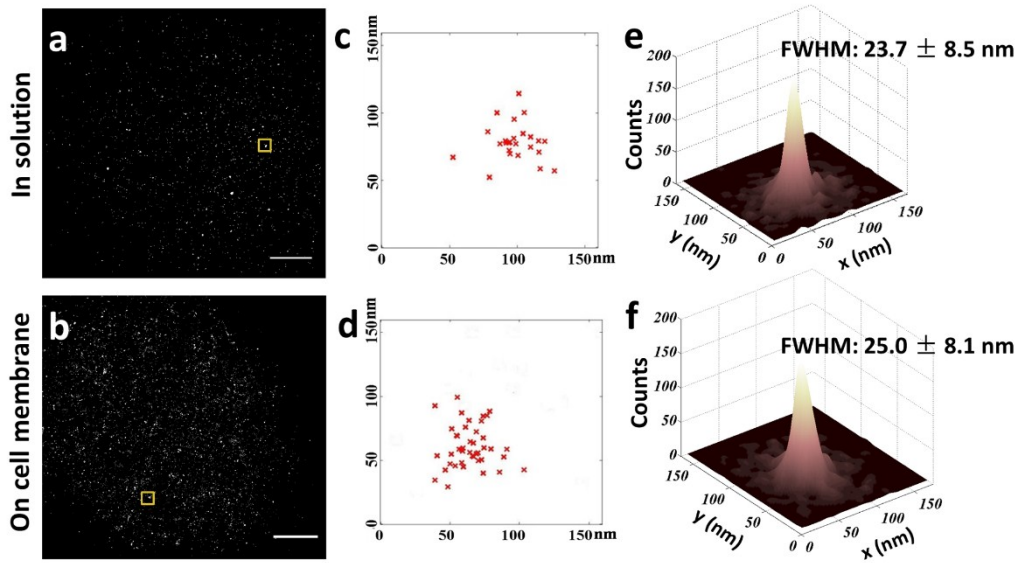

**Fig.S2** Measurements of the resolution of TAMRA-conjugated aptamer at a low concentration. (a-b) Representative dSTORM images of TAMRA-conjugated aptamers in solution (a) and on MCF-7 cell membranes (b). Scale bars, 5  $\mu$ m. (c-d) Repetitive localizations of a single TAMRA-aptamer molecule shown as crosses which were boxed in (a-b). (e-f) The three-dimensional Gaussian profile of localizations from 50 individual fluorescent molecules in three independent experiments. The full-width at half-maximum (FWHM) determined by Gaussian fitting represents a resolution of  $23.7 \pm 8.5$  nm for fluorescent probes in solution and  $25.0 \pm 8.1$  nm on cell membrane.

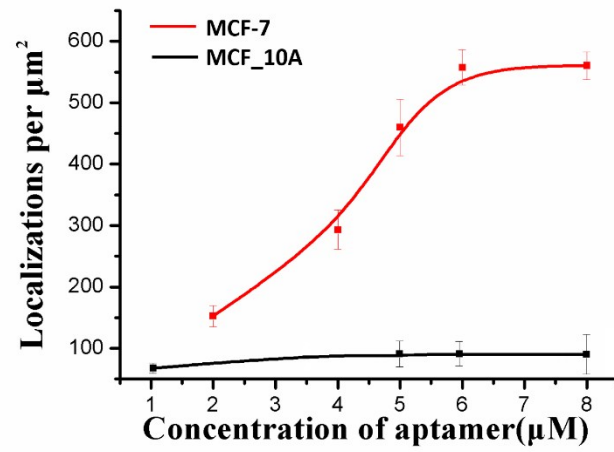

**Fig.S3** The saturated concentration curve of aptamers on MCF-7 and MCF-10A cells by calculating localization per  $\mu\text{m}^2$ . Data shown are means  $\pm$  standard deviation (s.d.). The results were obtained from ten cells in three independent experiments.

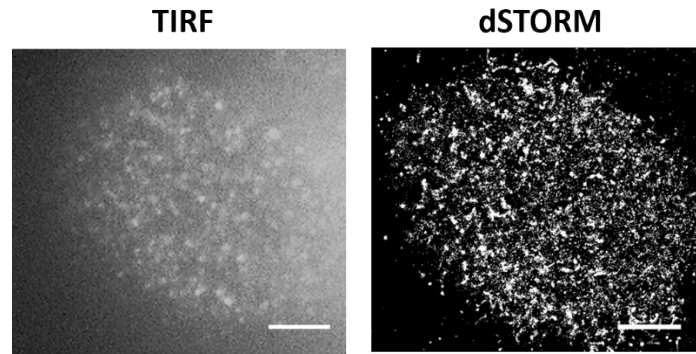

**Fig.S4** Conventional TIRF image and the corresponding dSTORM image of globo H on MCF-7 cell membrane. The conventional TIRF image displays a diffraction-limited distribution of globo H on the cell membranes, whereas the dSTORM imaging improved the resolution substantially. Scale bars, 5  $\mu\text{m}$ .

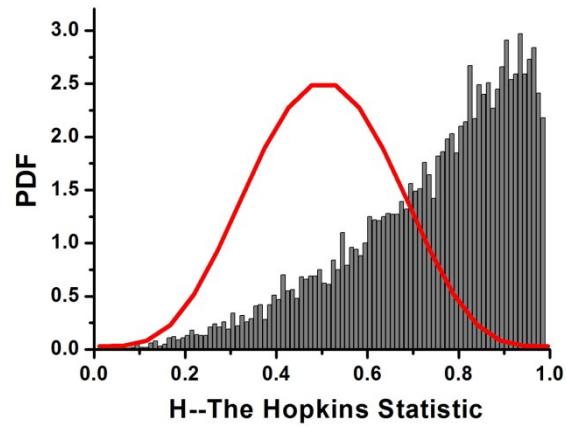

**Fig.S5** Average of the Hopkins statistic for testing spatial randomness on the examined domains. Red curve shows a random distribution, with centering at the Hopkins statistic 0.5 on the x-coordinate. Clustered points will result in an H value close to 1.

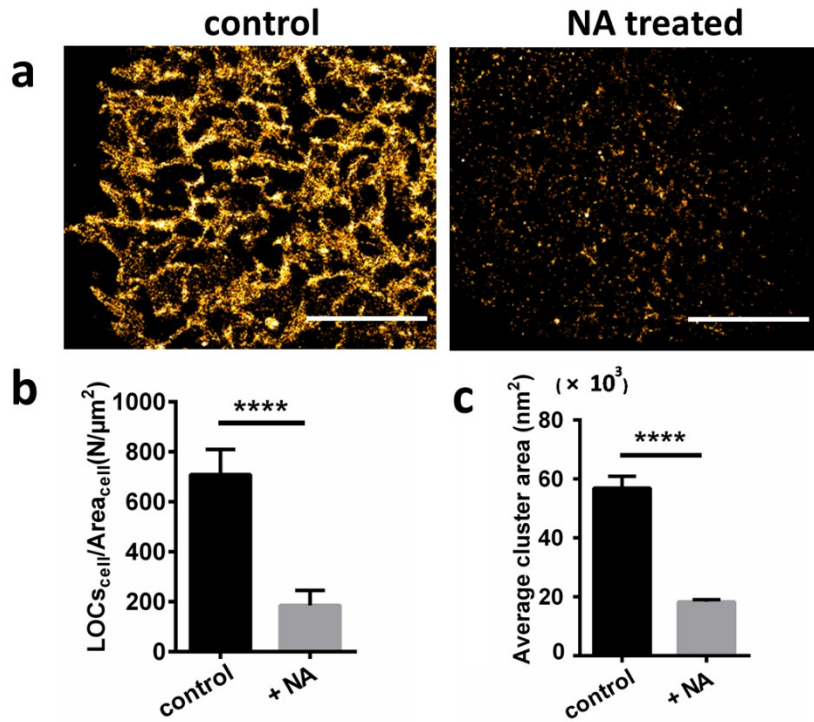

**Fig.S6** Neuraminidase treatment reduced sia clusters. (a) dSTORM images of sia on the control and neuraminidase-treated cell membranes. Scale bars are 5  $\mu m$ . (b-c) The number of localizations per  $\mu m^2$  (b) and the average cluster area on the control and treated cell membranes. LOCs is the abbreviation for localization. Data shown are means  $\pm$  standard deviation (s.d.). The statistical results were obtained from ten cells in three independent experiments. “\*\*\*\*” means  $P < 0.0001$ . Analysis of variance was processed using the two-tailed unpaired t-test.

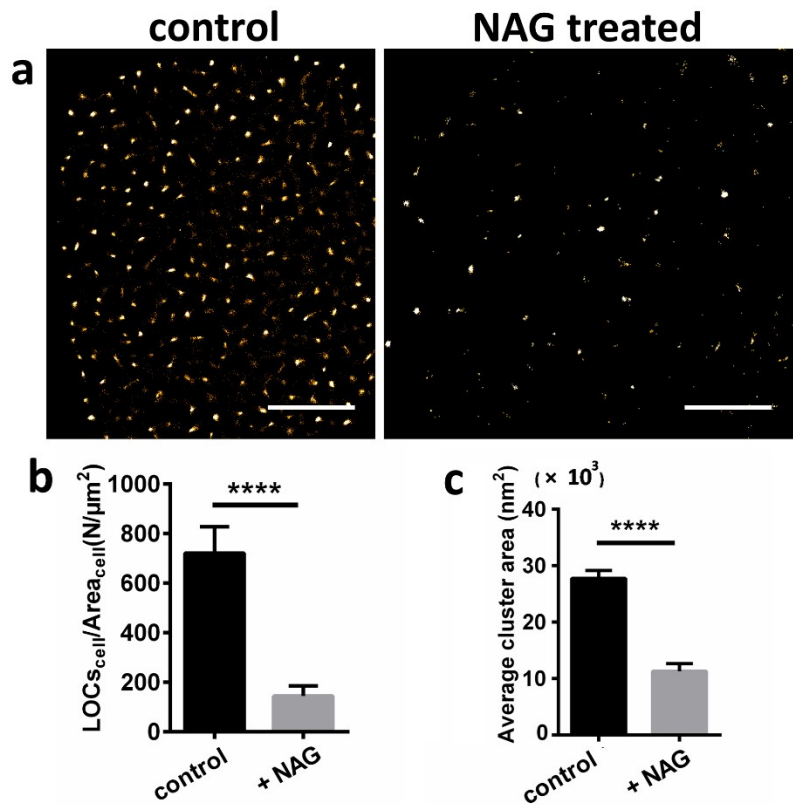

**Fig.S7** Changes of GlcNAc after N-acetyl- $\beta$ -D-glucosaminidase (NAG) treatment on the cell membranes. (a) dSTORM images of GlcNAc on the control and NAG-treated cell membranes. Scale bars are  $5 \mu\text{m}$ . (b) The number of localizations per  $\mu\text{m}^2$  of GlcNAc on the control and NAG-treated cell membranes. (c) The average area of these two types of clusters under the same conditions as (b). Data are the means  $\pm$  standard deviation (s.d.), which were obtained from ten cells in three independent experiments. “\*\*\*\*” means  $P < 0.0001$ . Analysis of variance was carried out by the two-tailed unpaired t-test.



**Table S1.** Quantitative characterization of globo H clusters.

| <b>Circularity</b> |                | <b>Diameter</b> |                | <b>Area</b>                               |                |
|--------------------|----------------|-----------------|----------------|-------------------------------------------|----------------|
| scope              | percentage (%) | scope (nm)      | percentage (%) | scope (x10 <sup>3</sup> nm <sup>2</sup> ) | percentage (%) |
| 0.1-0.2            | 0.1            | 30-60           | 3.8            | 0.9-4                                     | 4.1            |
| 0.2-0.3            | 2.0            | 60-100          | 23.0           | 4-7                                       | 9.8            |
| 0.3-0.4            | 9.1            | 100-300         | 60.9           | 7-10                                      | 12.0           |
| 0.4-0.5            | 17.3           | 300-600         | 11.1           | 10-40                                     | 45.5           |
| 0.5-0.6            | 20.8           | 600-900         | 1.1            | 40-70                                     | 11.5           |
| 0.6-0.7            | 19.0           | 900-1100        | 0.09           | 70-100                                    | 6.0            |
| 0.7-0.8            | 16.1           | >1100           | 0.03           | 100-400                                   | 10.6           |
| 0.8-0.9            | 10.1           |                 |                | 400-1000                                  | 0.5            |
| 0.9-1              | 5.5            |                 |                |                                           |                |

Statistics were from ten cells in five independent experiments.
